# Supplementary material
Source: PubMed Central journal article supplement (PMC3772990)

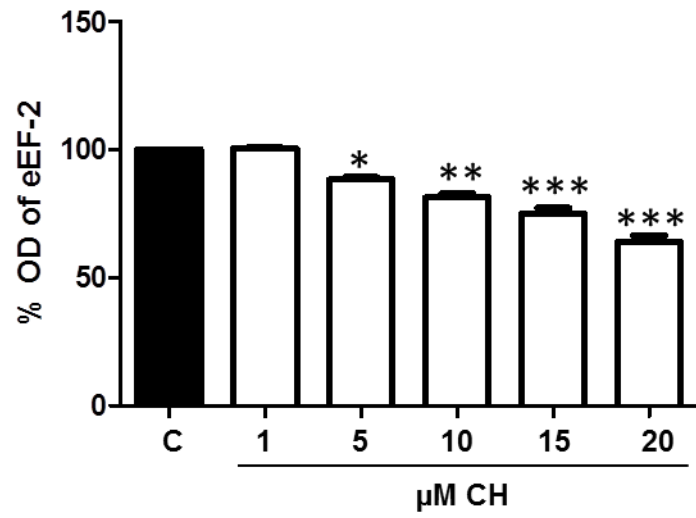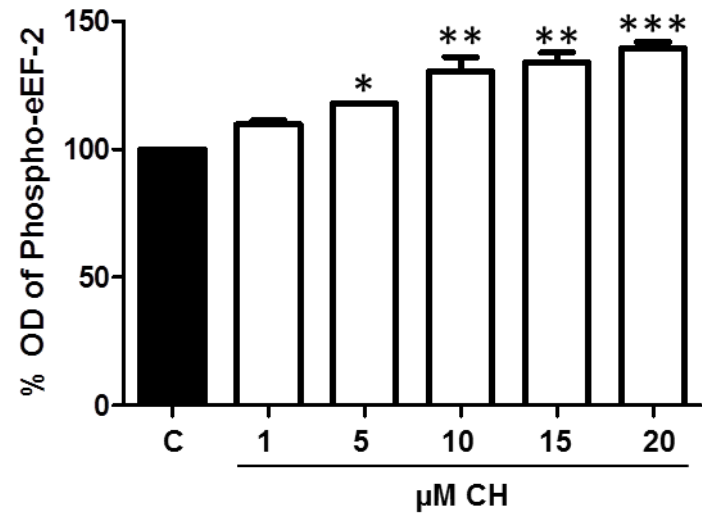

Supplementary figure 1

A

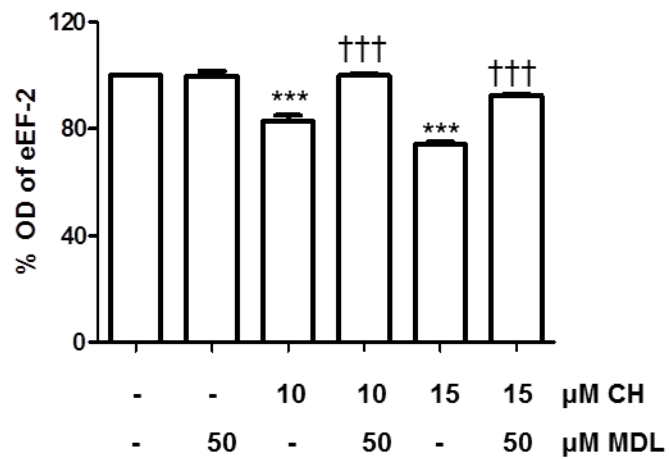

B

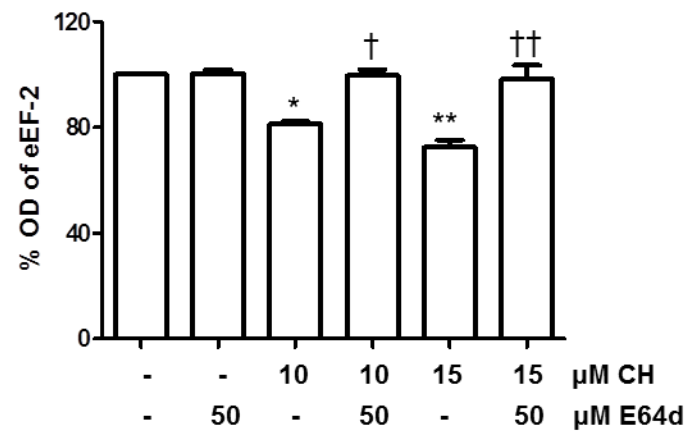

C

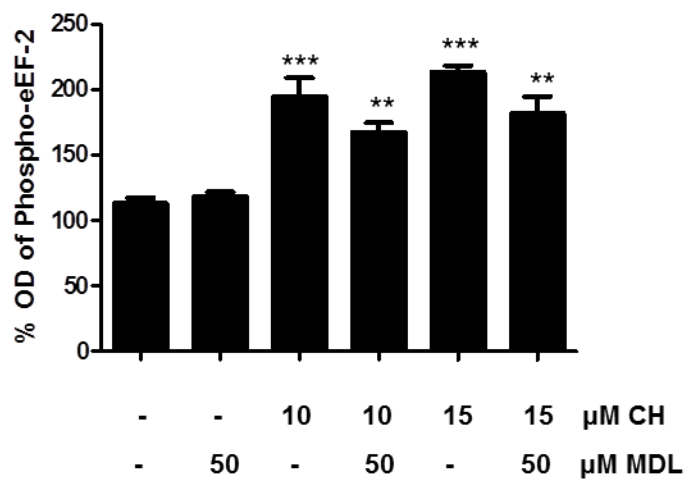

D

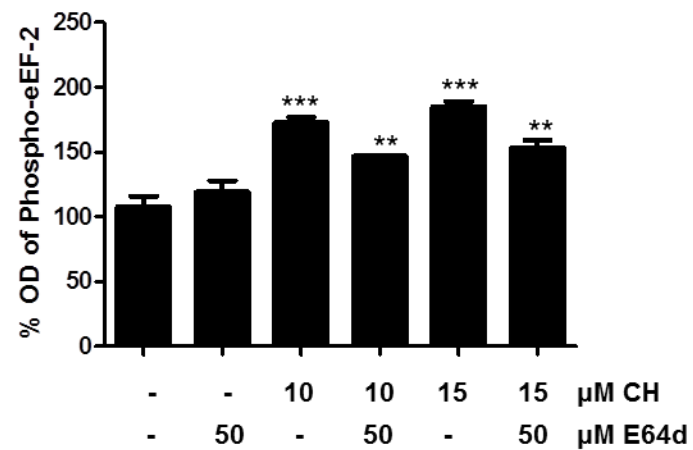

Supplementary figure 2

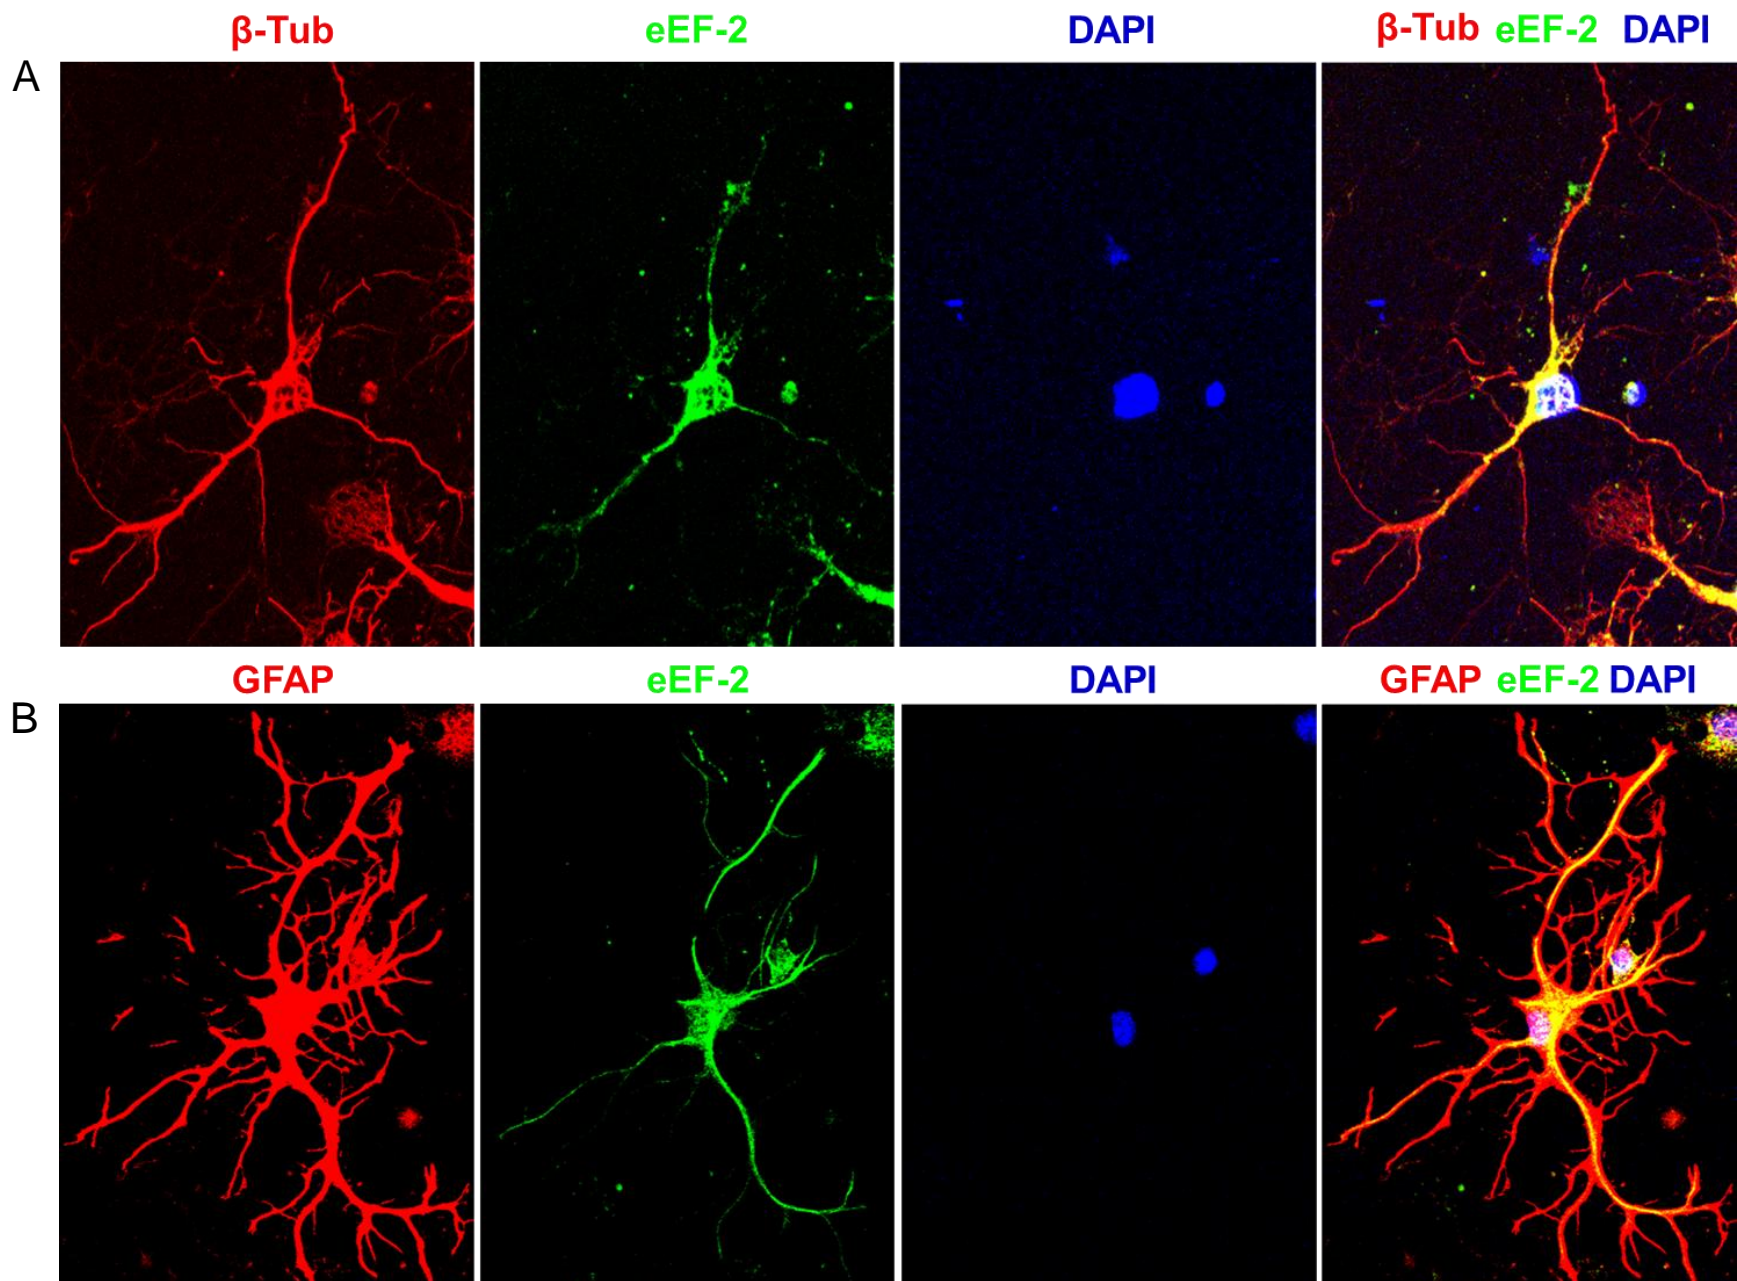

Supplementary figure 3

Supplement: NIHMS465714-supplement-01.pdf [file NIHMS465714-supplement-01.pdf]
